# Supplementary material
Source: PubMed Central journal article supplement (PMC4643059)
Supplement: NIHMS735481-supplement-2.pdf [file NIHMS735481-supplement-2.pdf]

**Supplementary Table 2 – Frequency of selected genes in SQ-MAP vs. TCGA**

|         | SQ-MAP (n=74) | TCGA (n=178) | p (Fisher's exact test) | p (adjusted for multiple testing) |
|---------|---------------|--------------|-------------------------|-----------------------------------|
| EP300   | 17.6%         | 4.5%         | 0.0017                  | 0.43                              |
| ARID1A  | 20.3%         | 6.7%         | 0.003                   | 0.76                              |
| NFKB1   | 9.5%          | 1.1%         | 0.003                   | 0.81                              |
| DDR2    | 8.1%          | 1.1%         | 0.009                   | 1                                 |
| AKT1    | 6.8%          | 0.6%         | 0.009                   | 1                                 |
| SMO     | 6.8%          | 0.6%         | 0.009                   | 1                                 |
| TET2    | 9.5%          | 2.3%         | 0.016                   | 1                                 |
| RET     | 8.1%          | 1.7%         | 0.021                   | 1                                 |
| EPHA10  | 10.8%         | 2.8%         | 0.023                   | 1                                 |
| DIS3    | 4.0%          | 0.00%        | 0.025                   | 1                                 |
| MITF    | 4.0%          | 0.00%        | 0.025                   | 1                                 |
| REL     | 4.0%          | 0.00%        | 0.025                   | 1                                 |
| LGR6    | 5.4%          | 0.6%         | 0.027                   | 1                                 |
| TMPRSS2 | 5.4%          | 0.6%         | 0.027                   | 1                                 |
| CBLB    | 10.8%         | 3.9%         | 0.045                   | 1                                 |
| FLT4    | 9.5%          | 2.8%         | 0.04                    | 1                                 |
| NF1     | 21.6%         | 11.2%        | 0.047                   | 1                                 |

**Supplementary Table 3 – Clinical characteristics of patients with resected brain metastases**

| <b>ID</b> | <b>Age</b> | <b>Sex</b> | <b>Race</b> | <b>Smoking status</b> | <b>Pack-years</b> | <b>Treatment</b>                                                                               |
|-----------|------------|------------|-------------|-----------------------|-------------------|------------------------------------------------------------------------------------------------|
| PP1       | 51         | Female     | White       | Former                | 10                | cisplatin + docetaxel -> cisplatin + gemcitabine -> sequential RT; gemcitabine; nab-paclitaxel |
| PP2       | 88         | Male       | White       | Former                | 50                | carboplatin + paclitaxel                                                                       |
| PP3       | 62         | Female     | White       | Current               | 33                | cisplatin + etoposide + concurrent RT                                                          |
| PP4       | 66         | Female     | White       | Former                | 20                | cisplatin + gemcitabine                                                                        |
| PP5       | 67         | Female     | White       | Former                | 50                | carboplatin + paclitaxel + concurrent RT                                                       |
| PP6       | 77         | Male       | White       | Current               | 53                | carboplatin + paclitaxel                                                                       |

**Supplementary Table 4 – Genes exhibiting clonal evolution from primary lung tumors and matched brain metastases. Data from PP1 and PP4 are shown.**

| <b>Subclonal in primary lung, clonal in brain metastasis</b> |            |
|--------------------------------------------------------------|------------|
| <b>PP1</b>                                                   | <b>PP4</b> |
| PCDHB6                                                       | MEI1       |
| PCDHGA10                                                     | UNC45B     |
| ANK2                                                         | SLC5A7     |
| NUDT6                                                        | PCDH18     |
|                                                              | CTBP1      |
|                                                              | HTR2A      |
|                                                              | PCDHGB2    |
|                                                              | SCARA5     |
|                                                              | PIWIL3     |
|                                                              | C2ord53    |
|                                                              | RNF144A    |
|                                                              | PCDHGA4    |
|                                                              | MORF4      |
|                                                              | METTL4     |
|                                                              | UBE4A      |
|                                                              | C4orf37    |
|                                                              | PSMD8      |
|                                                              | PGK2       |
|                                                              | KIAA1429   |

**Supplementary Table 5 – List of 279 oncogenes and tumor suppressors covered by the Integrated Mutation Profiling of Actionable Cancer Targets (IMPACT) assay.**

|        |          |          |        |        |          |         |          |        |
|--------|----------|----------|--------|--------|----------|---------|----------|--------|
| ABL1   | ABL2     | AKT1     | AKT2   | AKT3   | ALK      | ALOX12B | APC      | AR     |
| ARAF   | ARHGAP26 | ARID1A   | ARID2  | ASXL1  | ATM      | ATRX    | AURKA    | BAP1   |
| BCL2L1 | BCL2L11  | BCL6     | BCOR   | BIRC2  | BRAF     | BRCA1   | BRCA2    | BUB1B  |
| CARD11 | CBL      | CBLB     | CBLC   | CCND1  | CCNE1    | CD79B   | CDC42EP2 | CDC73  |
| CDH1   | CDH11    | CDK12    | CDK4   | CDK6   | CDK8     | CDKN1A  | CDKN2A   | CDKN2B |
| CDKN2C | CEBPA    | CHEK1    | CHEK2  | CIC    | CREBBP   | CRKL    | CRLF2    | CSF1R  |
| CTNNB1 | CYLD     | DAXX     | DDR2   | DICER1 | DIS3     | DNMT1   | DNMT3A   | DNMT3B |
| E2F3   | EGFR     | EIF4EBP1 | EP300  | EPHA10 | EPHA2    | EPHA3   | EPHA4    | EPHA5  |
| EPHA6  | EPHA7    | EPHA8    | EPHB1  | EPHB2  | EPHB3    | EPHB4   | EPHB6    | ERBB2  |
| ERBB3  | ERBB4    | ERG      | ESR1   | ETV1   | ETV6     | EZH2    | FAM123B  | FAM46C |
| FAS    | FAT1     | FBXO11   | FBXW7  | FGFR1  | FGFR2    | FGFR3   | FGFR4    | FH     |
| FLCN   | FLT1     | FLT3     | FLT4   | FOXL2  | FUBP1    | GATA1   | GATA2    | GATA3  |
| GLI1   | GLI3     | GNA11    | GNAQ   | GNAS   | GOLPH3   | GRIN2A  | GRM3     | GSK3B  |
| HDAC2  | HIF1A    | HMGA2    | HNF1A  | HRAS   | HSP90AA1 | IDH1    | IDH2     | IGF1R  |
| IGFBP7 | IKBKE    | IKZF1    | IL7R   | INPP4A | INPP4B   | INSR    | IRS1     | IRS2   |
| JAK1   | JAK2     | JAK3     | JUN    | KCNJ5  | KDM5C    | KDM6A   | KDR      | KEAP1  |
| KIT    | KLF6     | KRAS     | LDHA   | LGR6   | LMO1     | MAGI2   | MAP2K1   | MAP2K2 |
| MAP2K4 | MAP3K1   | MAP3K8   | MCL1   | MDM2   | MDM4     | MED12   | MEF2B    | MEN1   |
| MET    | MITF     | MLH1     | MLL    | MLL2   | MLL3     | MLST8   | MPL      | MSH2   |
| MSH6   | MTOR     | MYB      | MYC    | MYCL1  | MYCN     | MYD88   | NCOA2    | NF1    |
| NF2    | NFE2L2   | NFKB1    | NFKB2  | NKX2-1 | NOTCH1   | NOTCH2  | NOTCH3   | NOTCH4 |
| NPM1   | NRAS     | NTRK1    | NTRK2  | NTRK3  | PAK7     | PALB2   | PARK2    | PARP1  |
| PAX5   | PBRM1    | PDGFRA   | PDGFRB | PHOX2B | PIK3C2G  | PIK3CA  | PIK3CB   | PIK3CD |
| PIK3CG | PIK3R1   | PIK3R2   | PIK3R3 | PKM2   | PLK2     | PNRC1   | PPP2R1A  | PRDM1  |
| PREX2  | PRKAA2   | PRKAR1A  | PRKCI  | PTCH1  | PTEN     | PTPN11  | PTPRD    | PTPRS  |
| PTPRT  | RAF1     | RARA     | RB1    | REL    | RET      | RICTOR  | RNF43    | ROR2   |

**Supplementary Table 6**– Computational estimates of tumor purity (fractional) from whole-exome sequencing data for the paired lung primary and brain metastasis tumor samples compared to pathological evaluation of tumor purity in the same samples.

| <b>Sample</b> | <b>Computational estimate</b> | <b>Pathology estimate</b> |
|---------------|-------------------------------|---------------------------|
| PP1 brain     | 0.83                          | 0.90                      |
| PP1 lung      | 0.70                          | 0.80                      |
| PP3 brain     | 0.73                          | 0.70                      |
| PP5 brain     | 0.74                          | 0.60                      |
| PP4 brain     | 0.52                          | 0.60                      |
| PP4 lung      | 0.30                          | 0.50                      |
| PP2 brain     | 0.84                          | 0.80                      |
| PP2 lung      | 0.41                          | 0.40                      |
