# Supplementary material
Source: PubMed Central journal article supplement (PMC4643059)

# Supplementary Figure 1

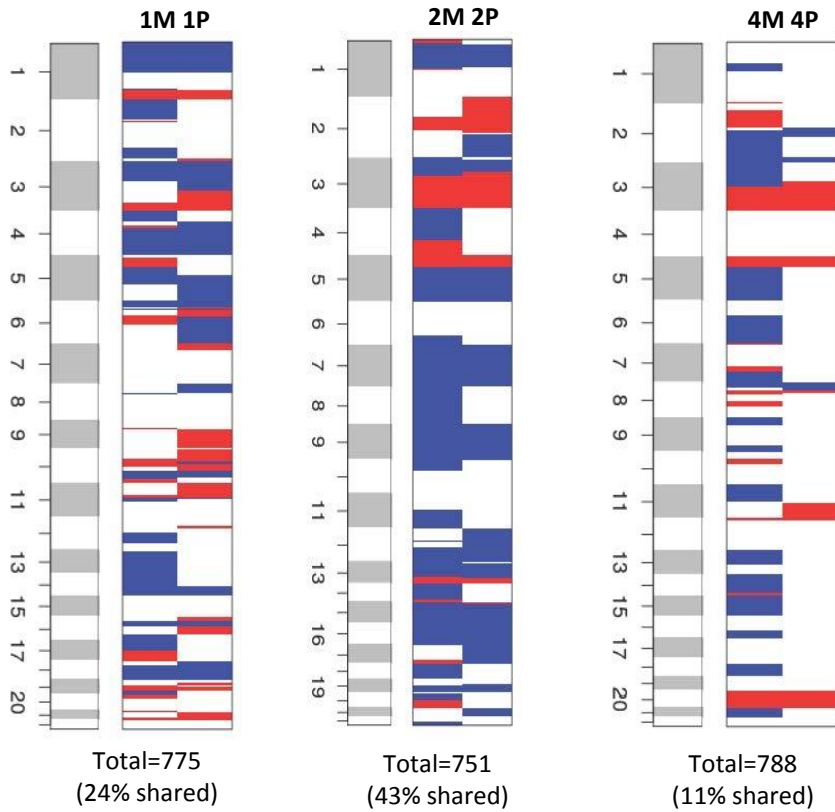

# Supplementary Figure 2A

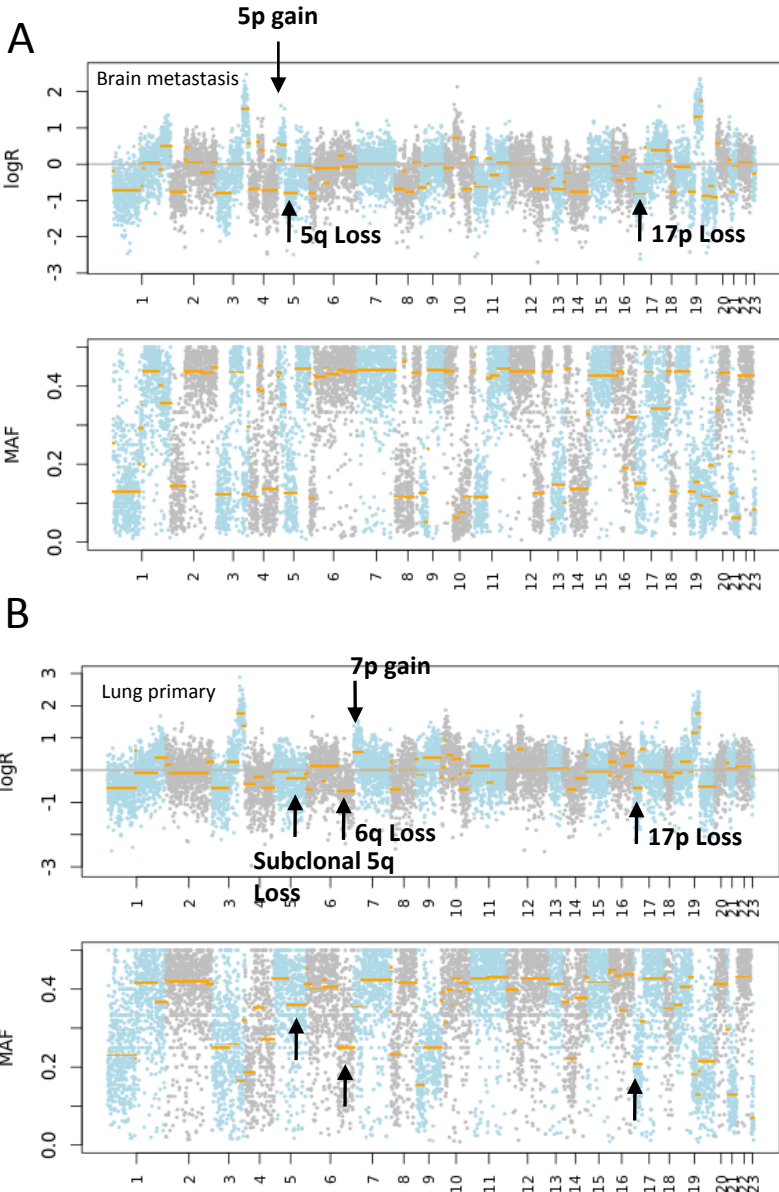

# Supplementary Figure 2B

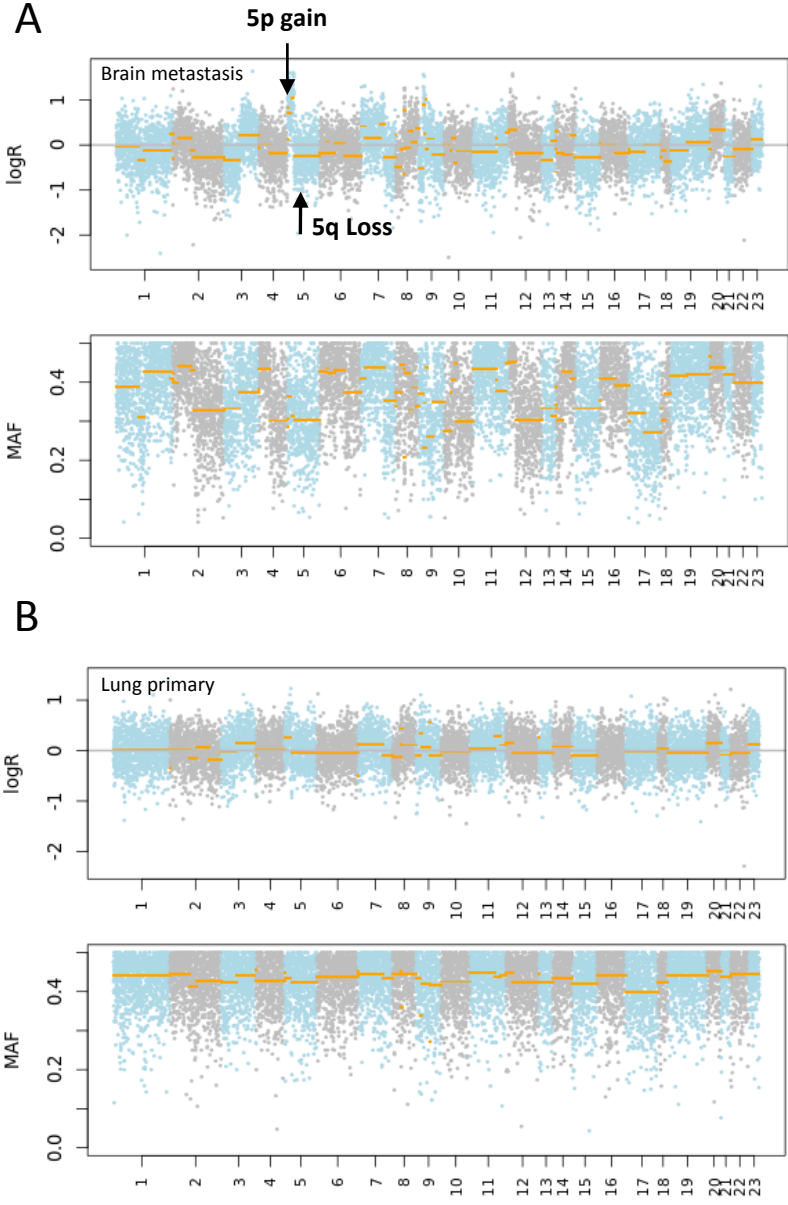

# Supplementary Figure 2C

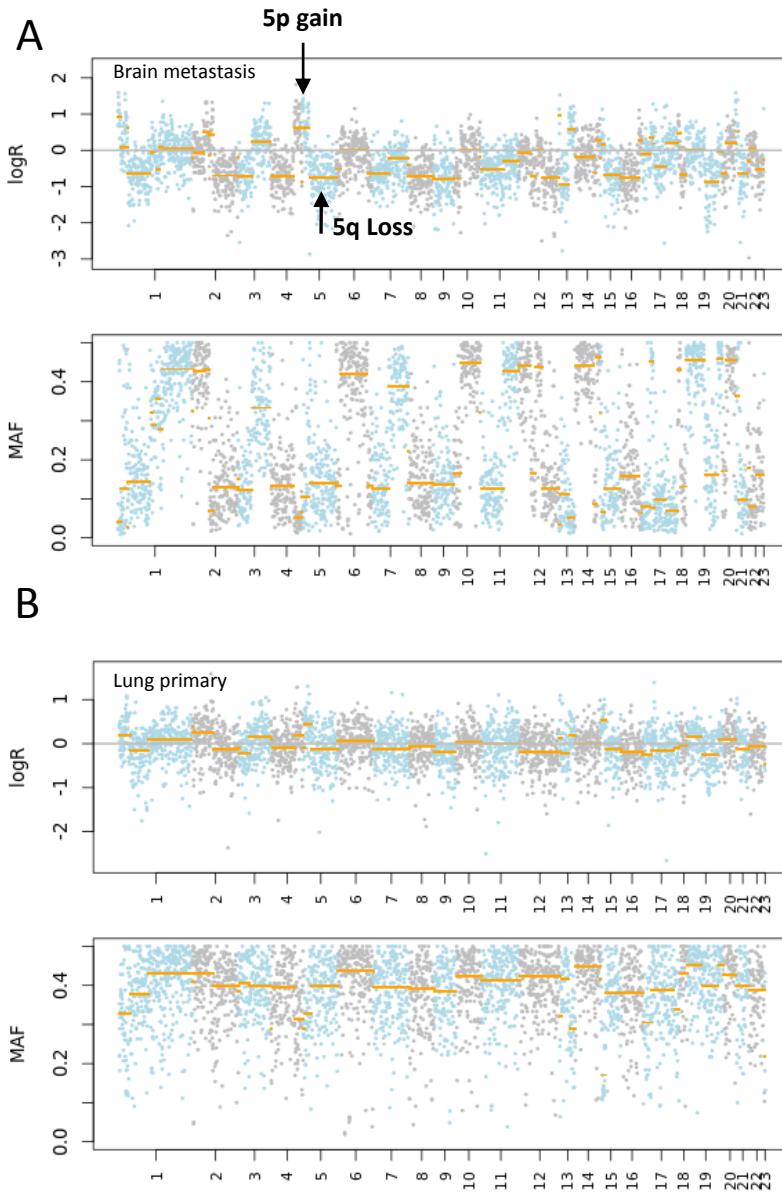

# Supplementary Figure 2D

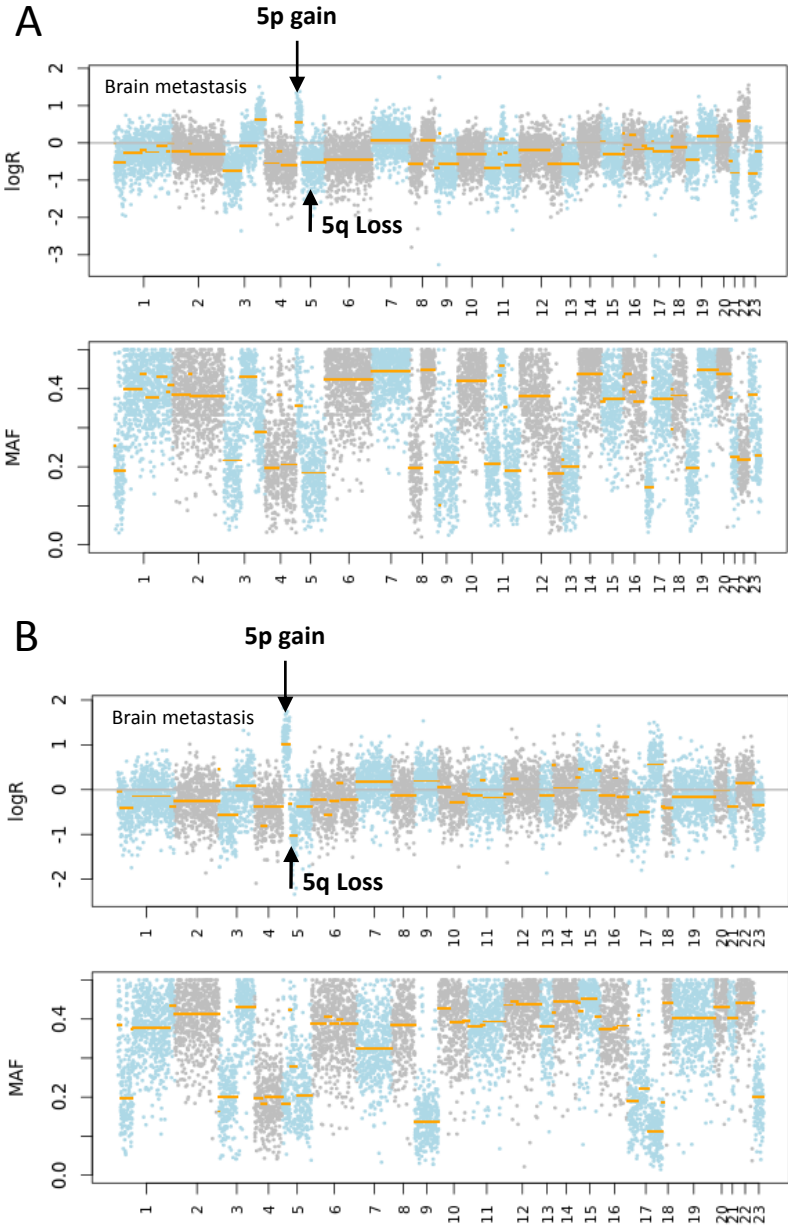

Supplement: NIHMS735481-supplement-3.pdf [file NIHMS735481-supplement-3.pdf]
