# Supplementary material
Source: PubMed Central journal article supplement (PMC4643059)

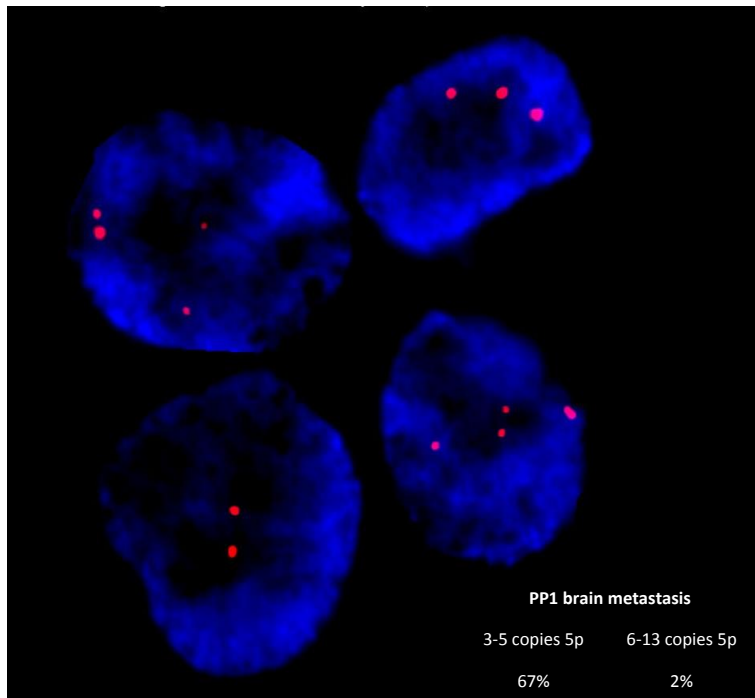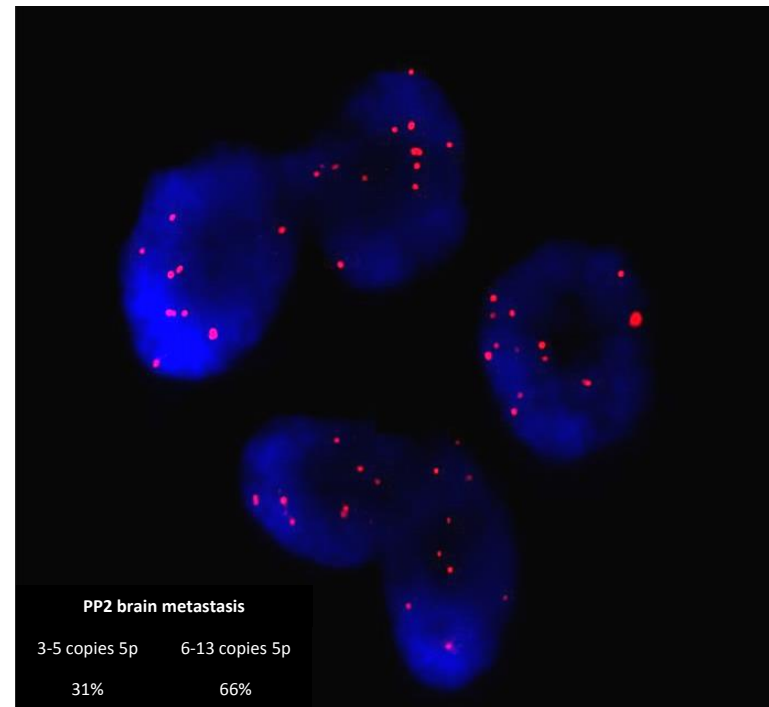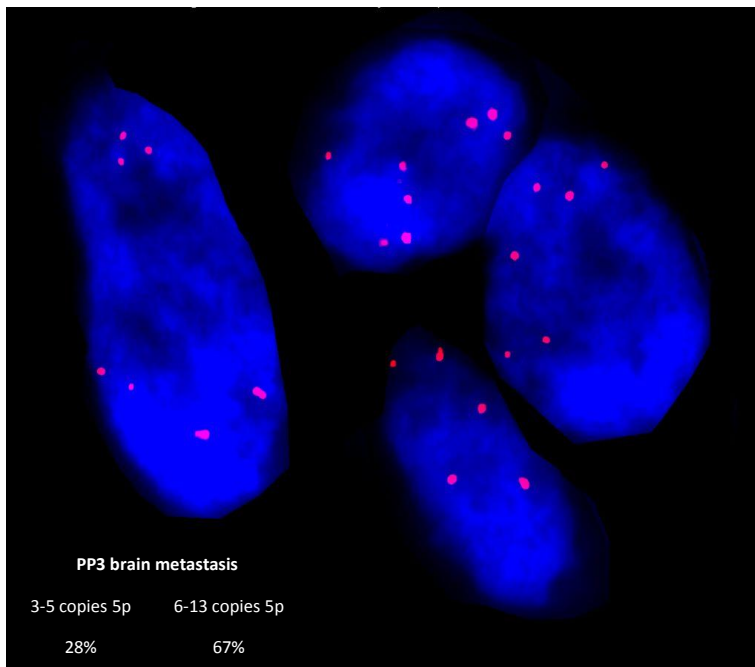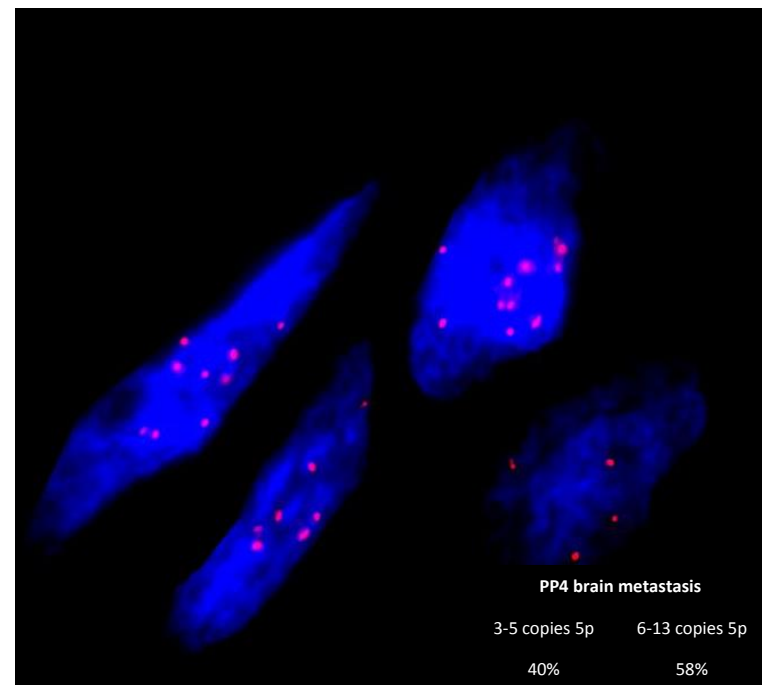

Supplement: NIHMS735481-supplement-4.pdf [file NIHMS735481-supplement-4.pdf]
