# Supplementary material
Source: PubMed Central journal article supplement (PMC4643059)

# Supplementary Figure 4

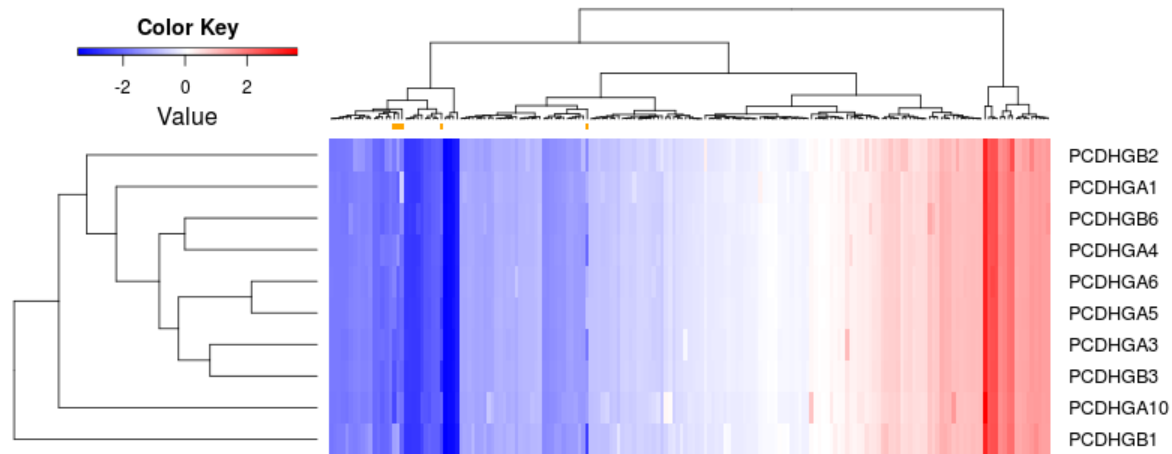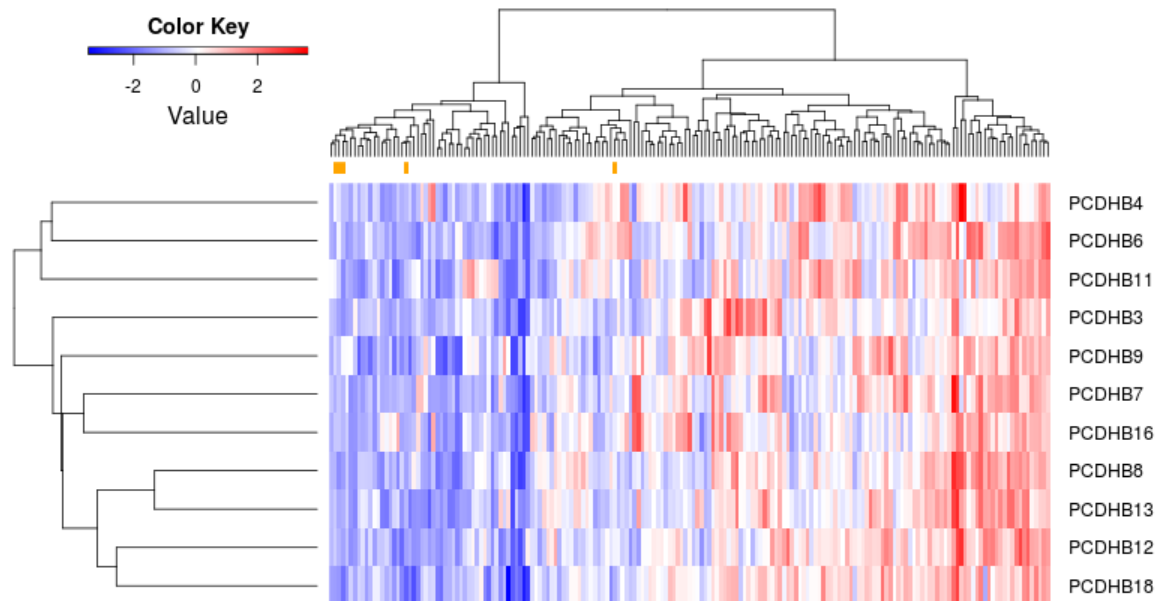

Supplement: NIHMS735481-supplement-5.pdf [file NIHMS735481-supplement-5.pdf]
